# Supplementary material for: Synthesis and biological studies of the thiols-triggered anticancer prodrug for a more effective cancer therapy
Source: Royal Society of Chemistry journal article supplement (doi:10.1039/c4ob02462a), 2015-01-01

# Synthesis and biological studies of the thiols-triggered anticancer prodrug for more effective cancer therapy

Yuanzhen Xu,<sup>a</sup> Jianjun Chen,<sup>a</sup> Ya Li,<sup>a</sup> Shoujiao Peng,<sup>a</sup> Xueyan Gu,<sup>b</sup> Meng Sun,<sup>a</sup> Kun Gao\*<sup>a</sup>  
and Jianguo Fang\*<sup>a</sup>

<sup>a</sup>State Key Laboratory of Applied Organic Chemistry, College of Chemistry and Chemical Engineering, Lanzhou University, Lanzhou 730000, People's Republic of China

<sup>b</sup>Gansu Key Laboratory of Biomonitoring and Bioremediation for Environmental Pollution, School of Life Sciences, Lanzhou University, Lanzhou 730000, People's Republic of China

## Table of Contents

HPLC analysis

Figures and schemes

NMR and mass spectral data of **1** and **5**

**General information:**  $^1\text{H}$  NMR and  $^{13}\text{C}$  NMR spectra were recorded on a Varian Mercury Plus-400 (400 MHz) spectrometer with TMS as the internal standard. Chemical shifts were reported as  $\delta$  values relative to the internal standard. HRMS-ESI spectra were determined on a Bruker Daltonics APEXII 47e spectrometer.

### **HPLC analysis**

HPLC analysis were performed on Waters 1525-2998 series HPLC system (C18 column, Sun Fire, 5  $\mu\text{m}$ , 4.6 mm $\times$ 150 mm, UV wavelength, maximal absorbance at 274 nm; temperature, ambient; injection volume, 10  $\mu\text{L}$ ). To separate adducts, solvents A ( $\text{H}_2\text{O}$ ) and B (MeOH) were used, delivered at a flow rate of 0.8 mL/min with the following gradient: A, 95% for 5 min; A from 95% to 60% in 1 min; A 60% for 6 min; A from 60% to 40% in 1 min; A, 40% for 5 min; A from 40% to 0% in 1 min; B 100% for 3 min.

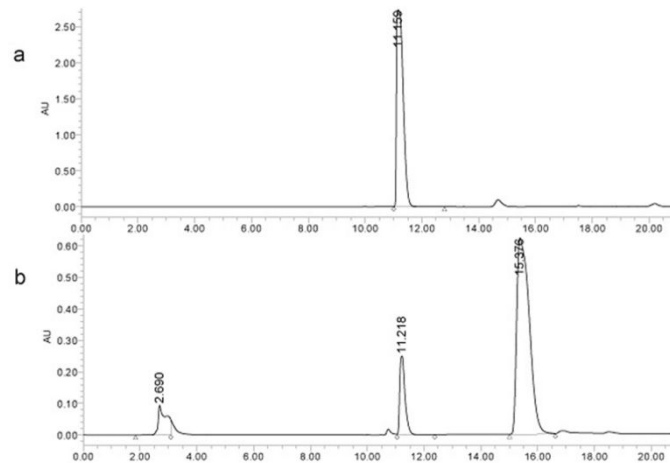

**Figure S1.** HPLC analysis: (a) 4-hydroxybenzyl alcohol; (b) reaction of **1** and L-Cys.

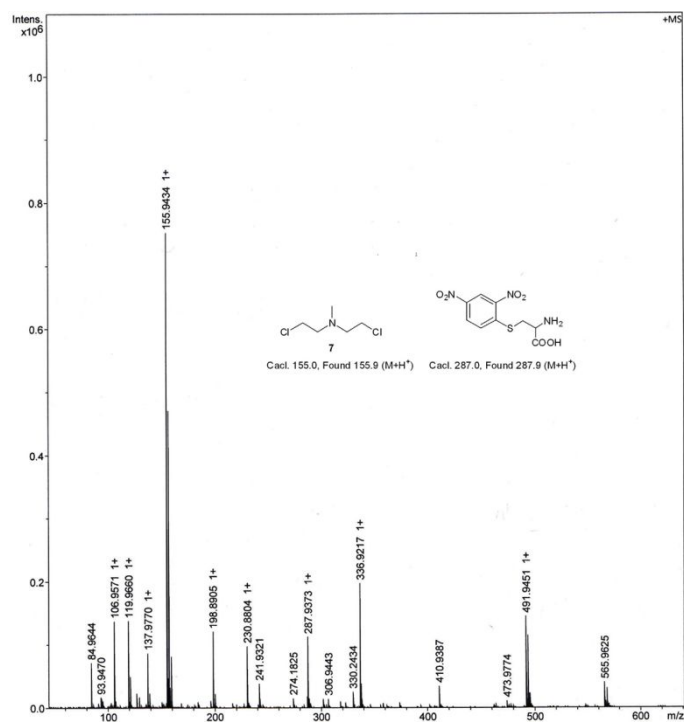

**Figure S2.** MS spectra of the mixture for the reaction of **1** with L-Cys.

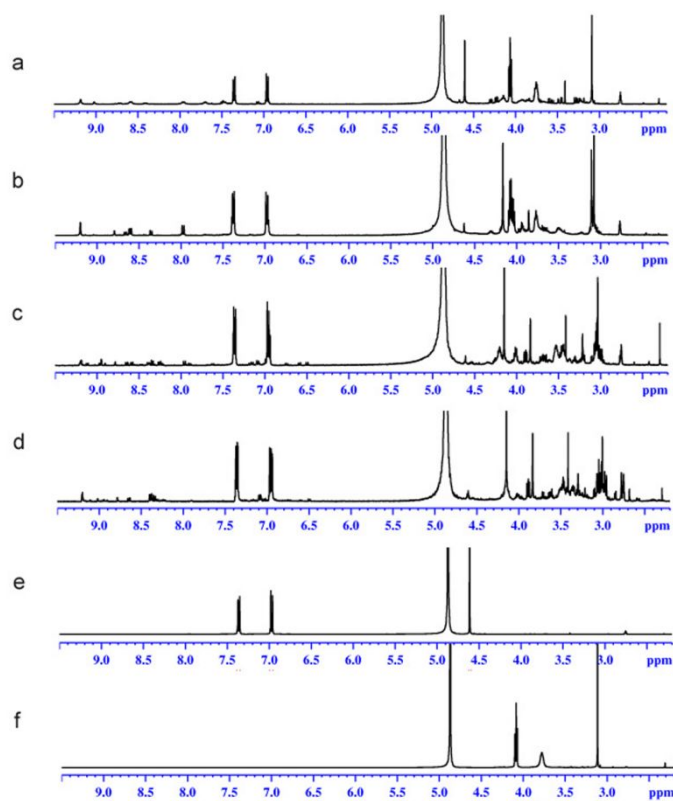

**Figure S3.**  $^1\text{H}$  NMR analysis of the activation of **1** by L-Cys in deuterated monopotassium phosphate buffer at different pH: (a) 5.5; (b) 6.8; (c) 7.4; (d) 8.2; (e)  $^1\text{H}$  NMR of **8** in  $\text{D}_2\text{O}$  at pH 5.5; (f)  $^1\text{H}$  NMR of mechlorethamine with equivalent  $\text{H}^+$  in  $\text{D}_2\text{O}$  at pH 5.5. The mixture was incubated at r.t. for 24 h.

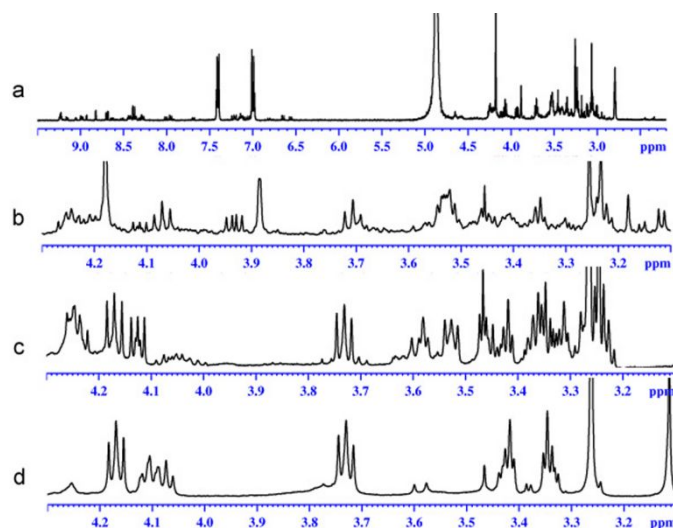

**Figure S4.** <sup>1</sup>H NMR analysis of the activation of **1** by L-Cys in deuterated monopotassium phosphate buffer at pH 7.4: (a) the mixture was incubated for 7 h; (b) the detailed information between  $\delta$  4.3 and  $\delta$  3.1 in (a); (c) <sup>1</sup>H NMR of mechlorethamine in alkaline condition; (d) <sup>1</sup>H NMR of mechlorethamine in neutral condition.

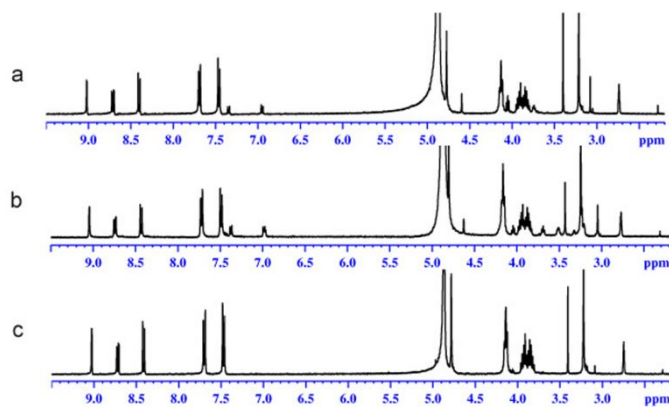

**Figure S5.** <sup>1</sup>H NMR analysis of the stability of **1** in deuterated monopotassium phosphate buffer at r.t.: (a) pH 5.5, incubated for 24 h; (b) pH 7.4, incubated for 7 h; (c) <sup>1</sup>H NMR of **1** in D<sub>2</sub>O.

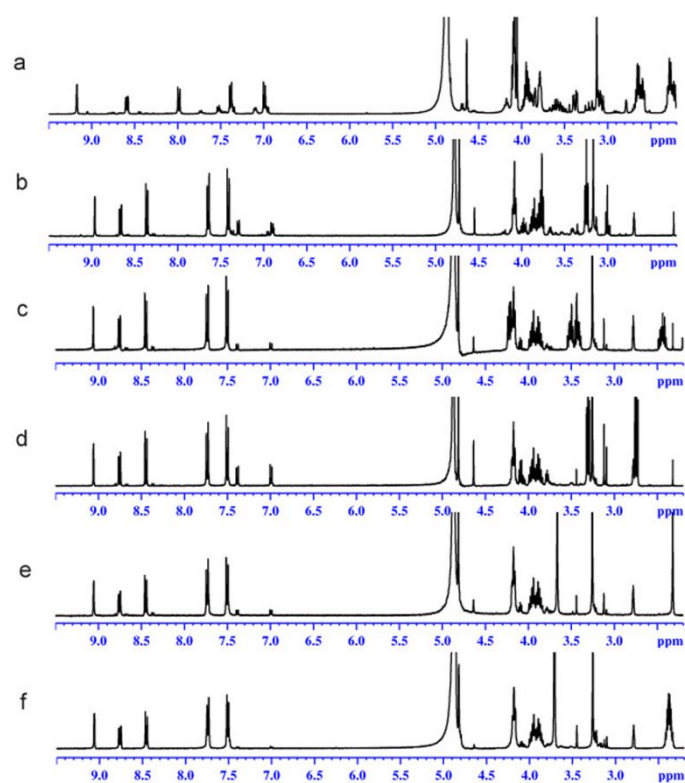

**Figure S6.**  $^1\text{H}$  NMR analysis of the inducible activity of **1** in deuterated monopotassium phosphate buffer at pH 5.5 toward: (a) GSH; (b) L-arginine; (c) L-proline; (d)  $\beta$ - alanine; (e) glycine; (f) L-valine. The solution was incubated at r.t. for 24 h.

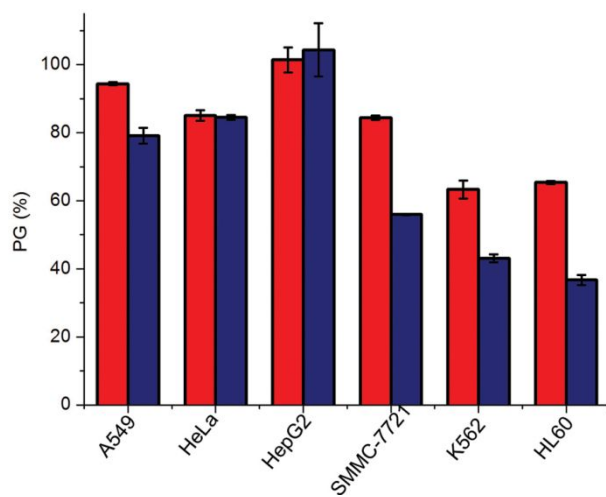

**Figure S7.** Effect of **5** on cancer cells. Time matched control samples are set up concurrently (without **5**). Data are expressed as the mean  $\pm$  SE of three independent experiments. (red bar, 26  $\mu$ M; blue bar, 52  $\mu$ M). PG: percentage of growth.

**Scheme S1:** the synthesis and reaction mechanism of fluorescent probe.

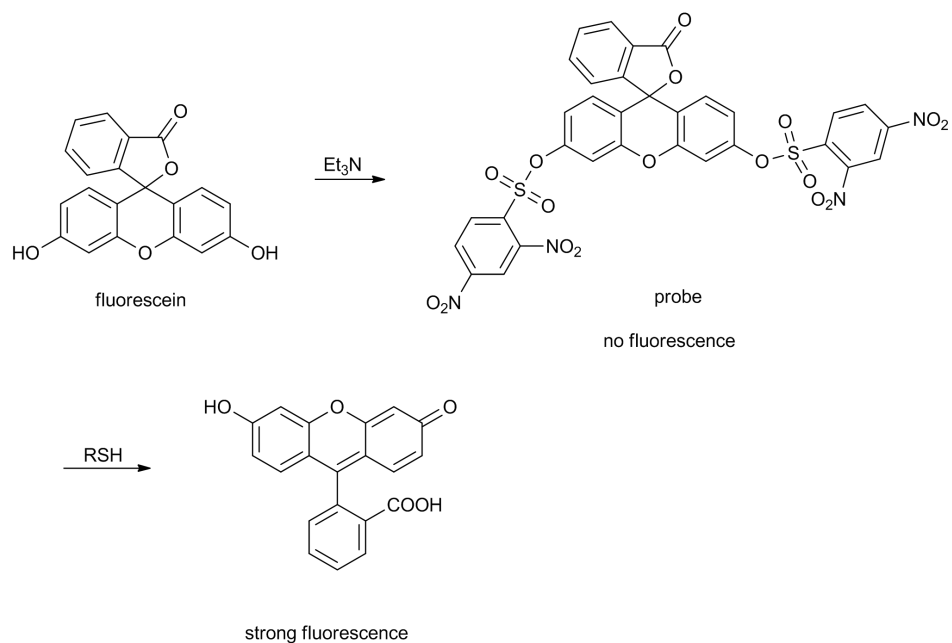

**Scheme S2:** cross-linking Formation Induced by **1** upon GSH Activation.

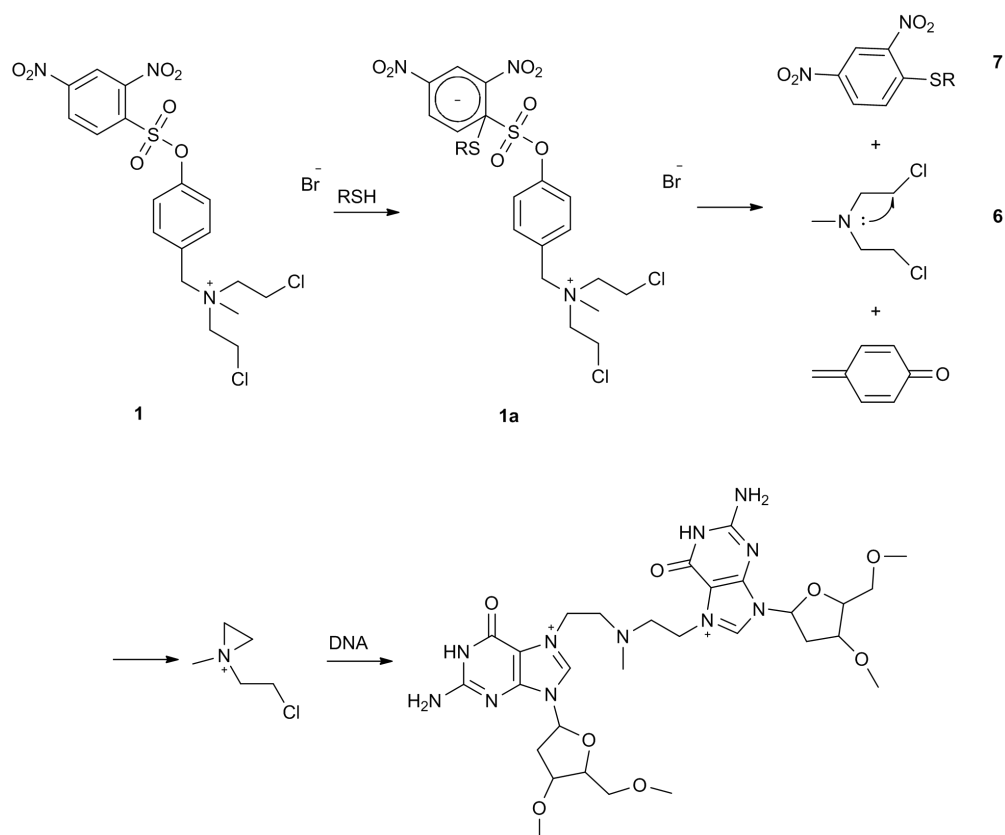



$^1\text{H}$  NMR,  $^{13}\text{C}$  NMR and HRMS-ESI spectra of **1**

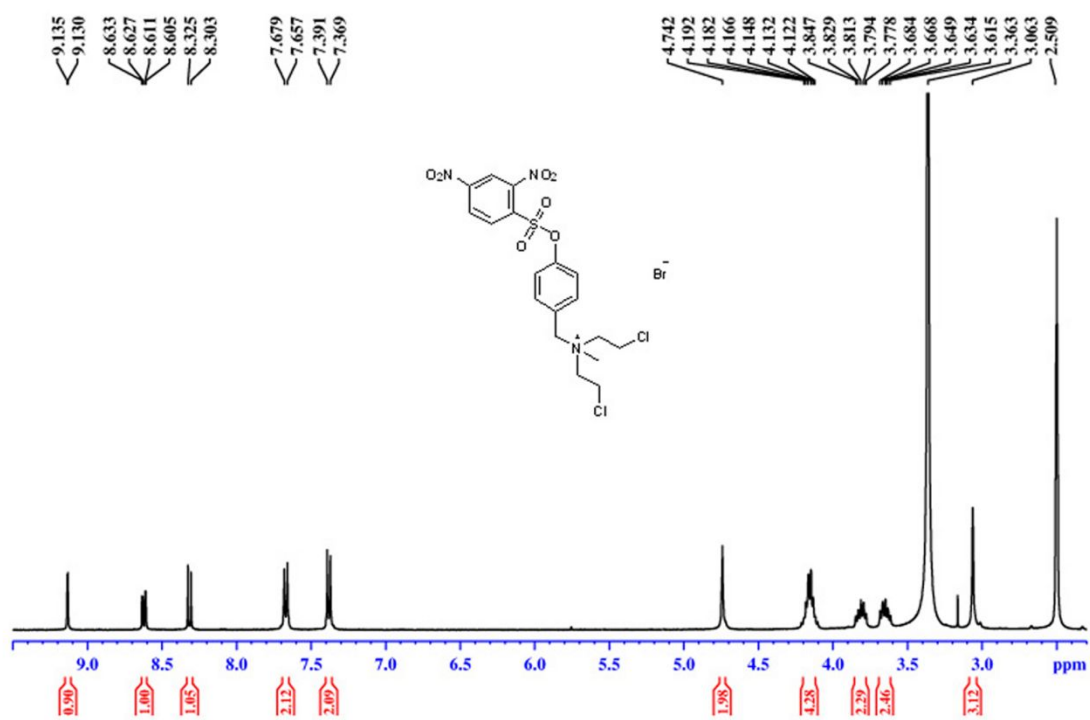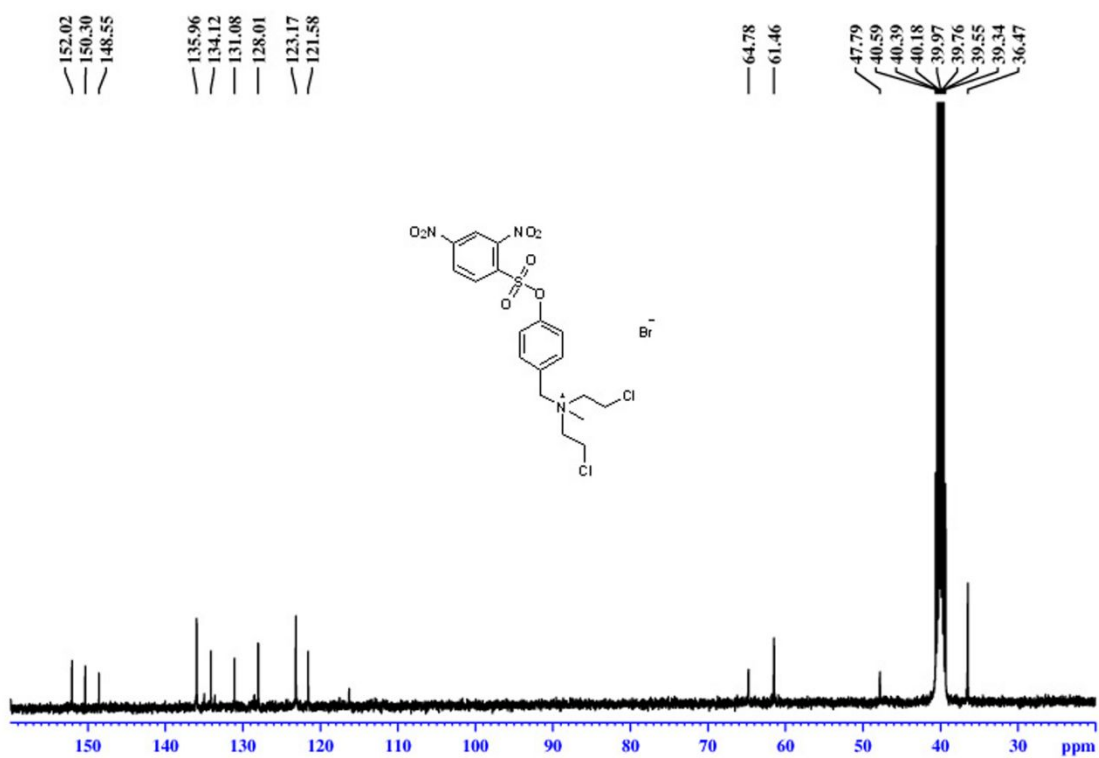

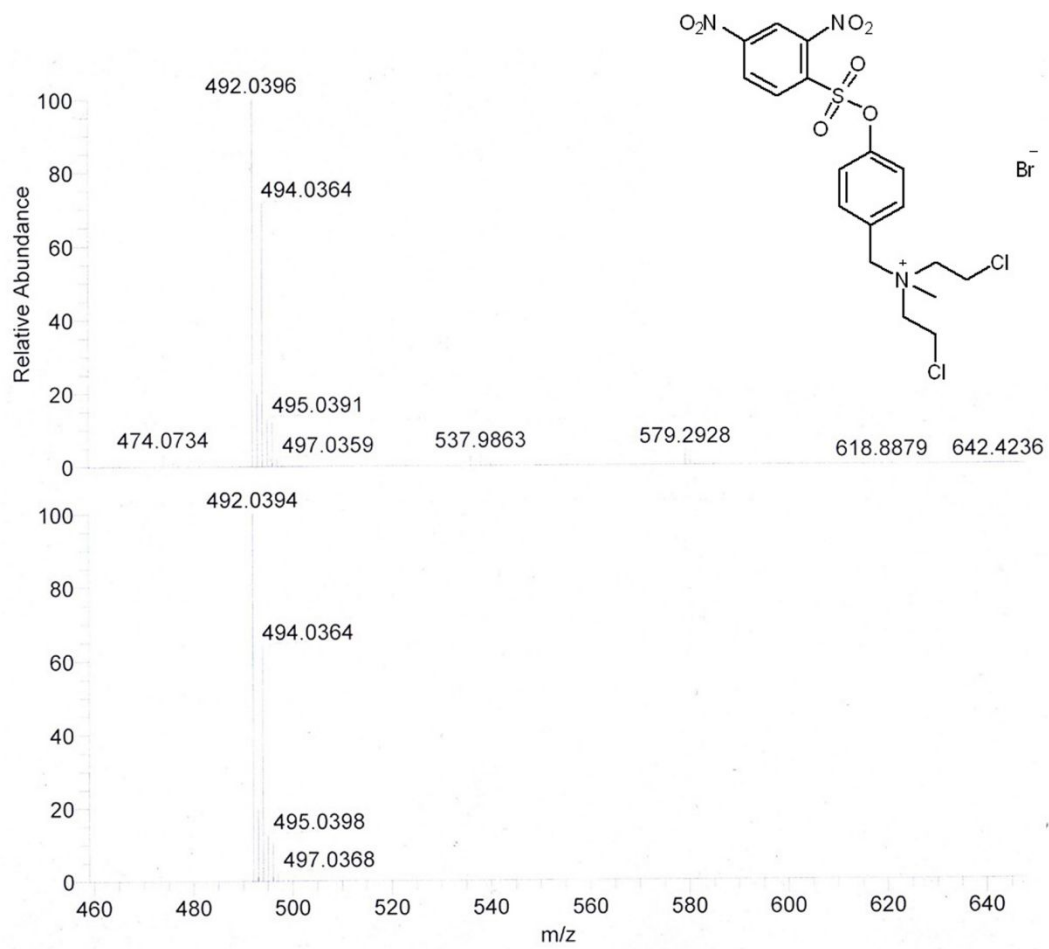

$^1\text{H}$  NMR,  $^{13}\text{C}$  NMR and HRMS-ESI spectra of **5**

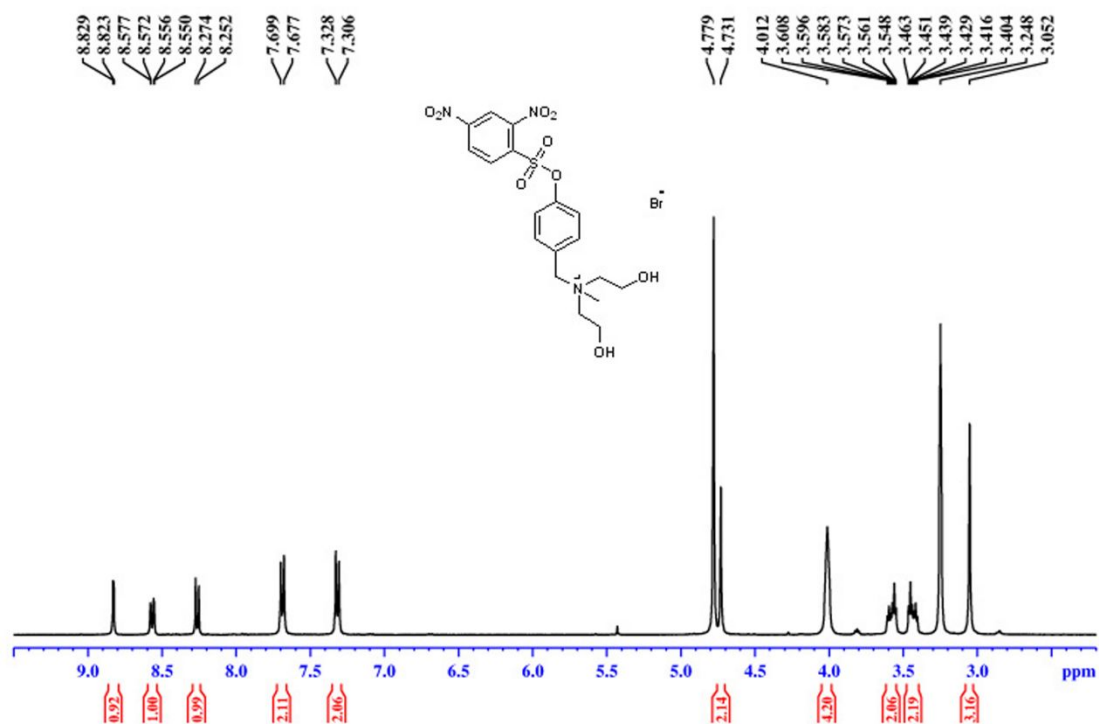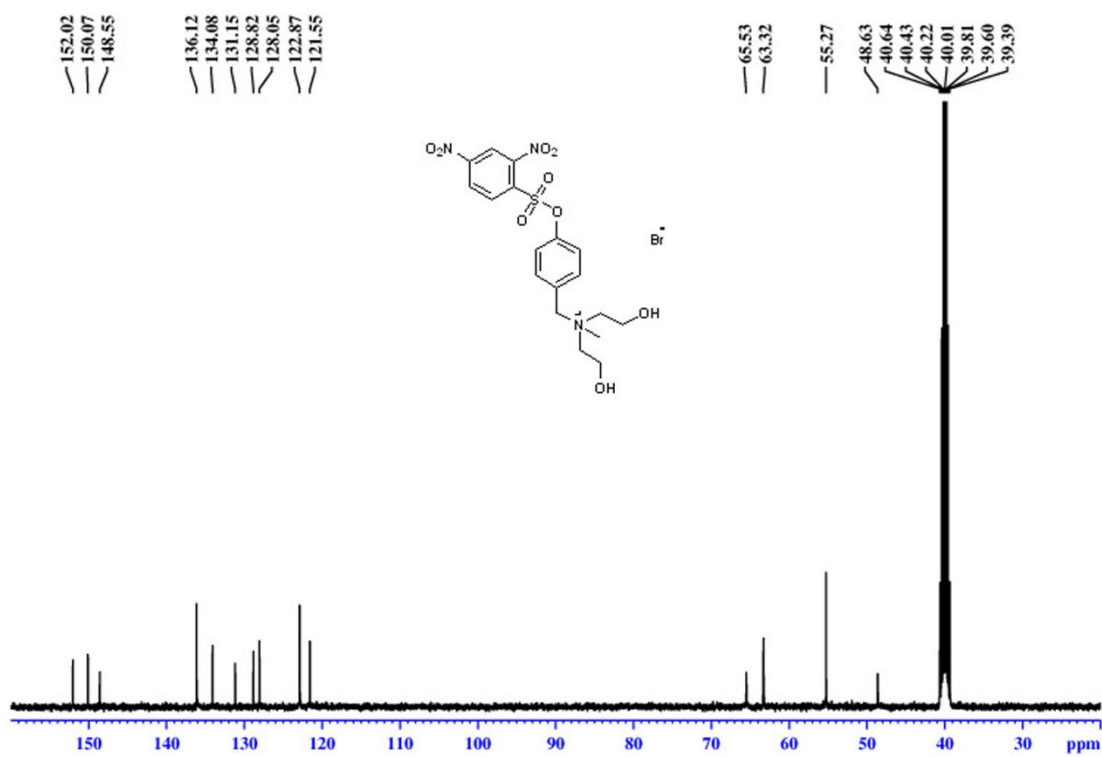

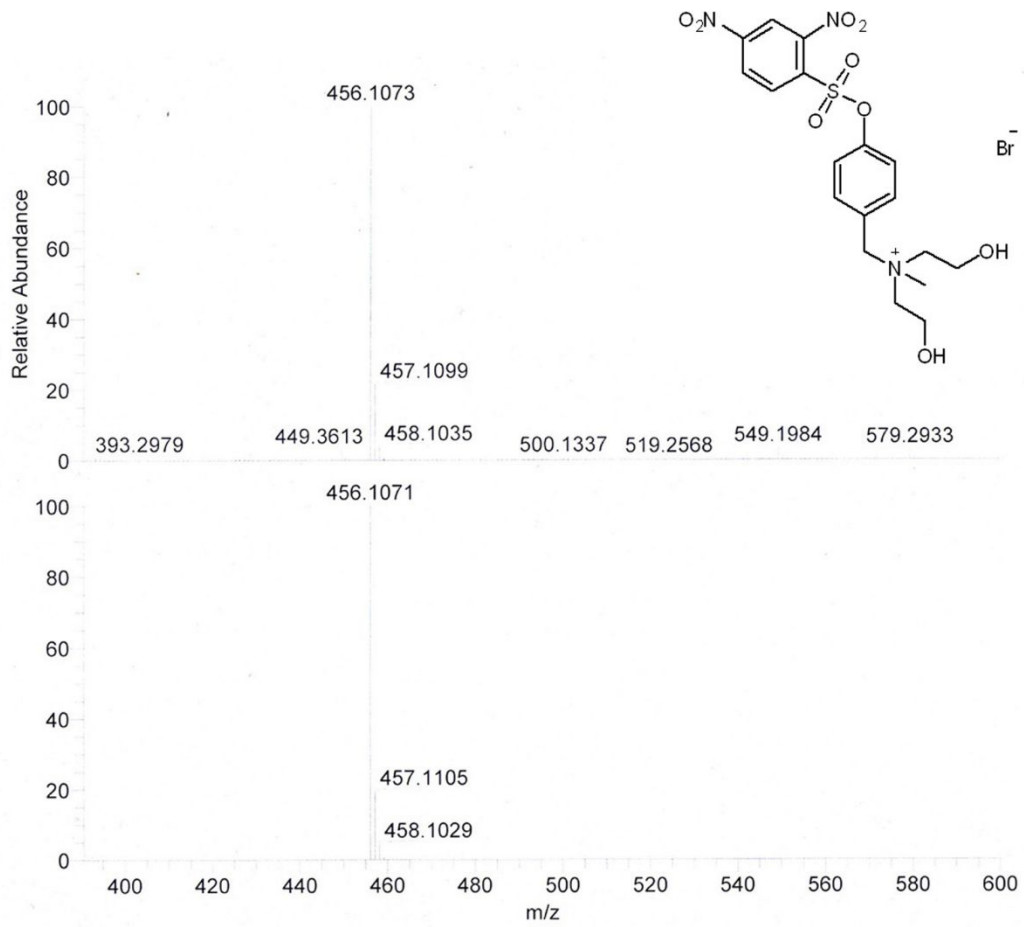

Supplement: c4ob02462a1.pdf [file c4ob02462a1.pdf]
